# Supplementary material for: Lactobacillus murinus alleviate intestinal ischemia/reperfusion injury through promoting the release of interleukin-10 from M2 macrophages via Toll-like receptor 2 signaling
Source: PubMed Central journal article supplement (PMC8896269; doi:10.1186/s40168-022-01227-w), 2022-03-03

**Figure S1**

**a**

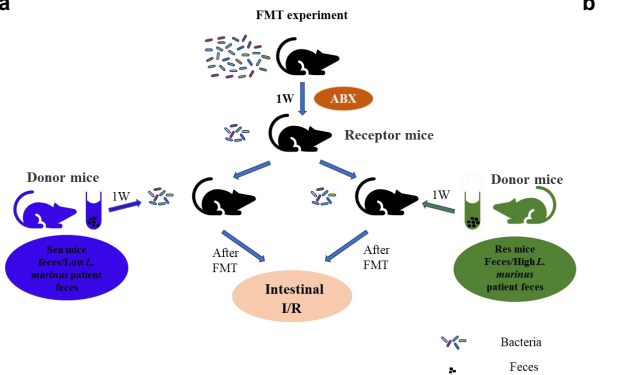

**b**

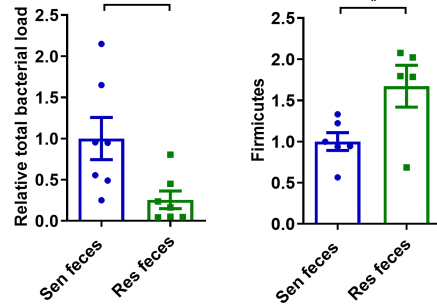

**c**

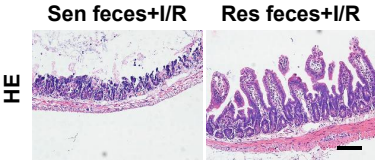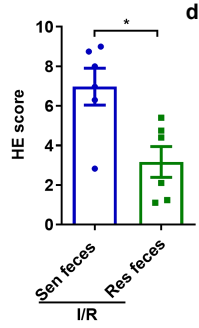

**d**

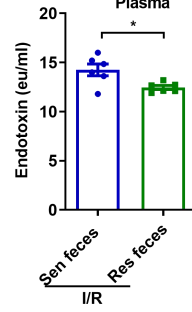

**e**

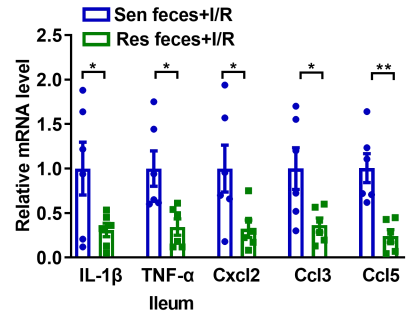

**f**

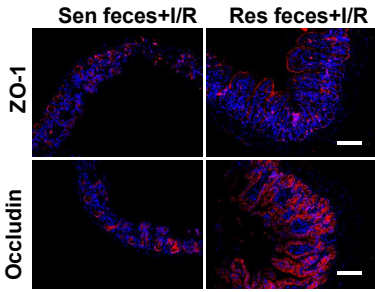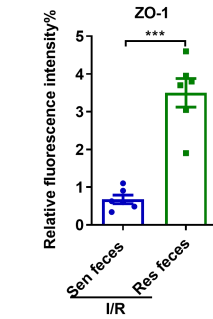

**g**

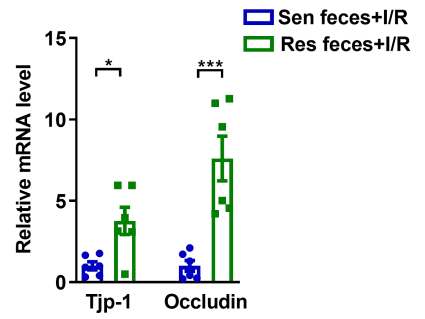

**h**

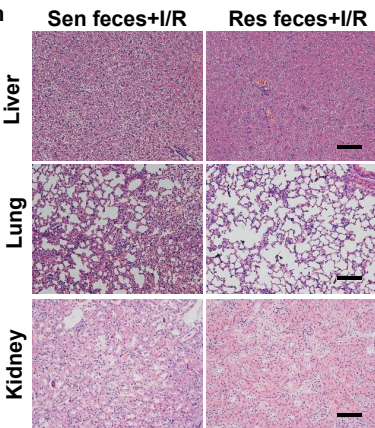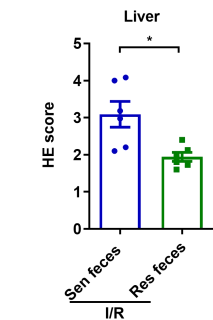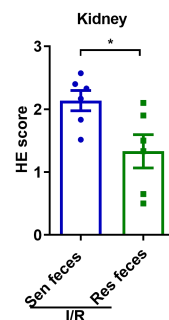

**i**

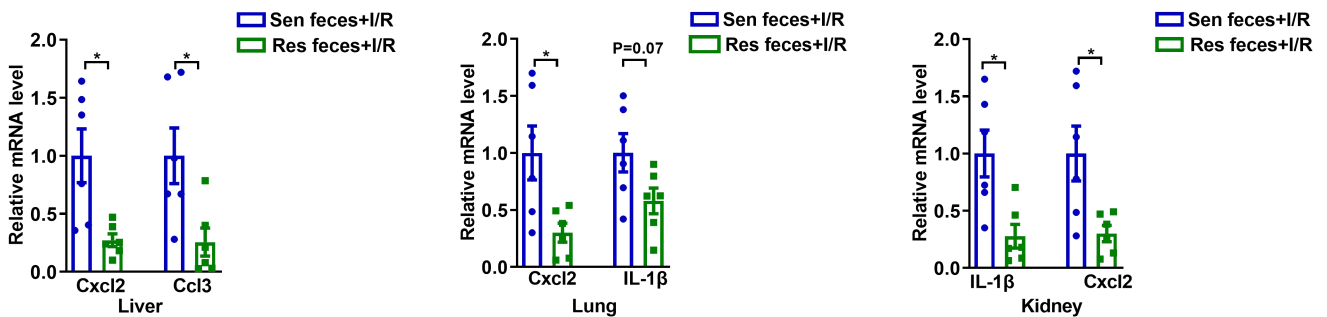

Supplement: 40168_2022_1227_MOESM2_ESM.pdf [file 40168_2022_1227_MOESM2_ESM.pdf]
