# Supplementary material for: Lactobacillus murinus alleviate intestinal ischemia/reperfusion injury through promoting the release of interleukin-10 from M2 macrophages via Toll-like receptor 2 signaling
Source: PubMed Central journal article supplement (PMC8896269; doi:10.1186/s40168-022-01227-w), 2022-03-03
Supplement: 40168_2022_1227_MOESM4_ESM.pdf [file 40168_2022_1227_MOESM4_ESM.pdf]

## Supplementary table1 primer Sequences

| Gene          | Forward primer (5'-3') | Reverse primer (5'-3')  |
|---------------|------------------------|-------------------------|
| 18S           | CGATCCGAGGGCCTCACTA    | AGTCCCTGCCCTTTGTACACA   |
| IL-1 $\beta$  | TGTGAAATGCCACCTTTTGA   | GGTCAAAGGTTTGGGAAGCAG   |
| IL-6          | TGATGCACTTGCAGAAAACA   | ACCAGAGGAAATTTTCAATAGGC |
| TNF $\alpha$  | CCACCACGCTCTTCTGTCTAC  | AGGGTCTGGGCCATAGAACT    |
| MPO           | GATGACCCCTGCCTCCTC     | GCTCTCGAACAAAGAGGGTG    |
| Claudin-1     | GAGGGACTGTGGATGTCCTG   | ATGCCAATTACCATCAAGGC    |
| Claudin-2     | CAGAGCTCTTCGAAAGGACG   | TCACAGTGTCTCTGGCAAGC    |
| Claudin-7     | TGTACAAGGGGCTCTGGATG   | GGACACCACCATTAAGGCTC    |
| Occludin      | CATTTATGATGAACAGCCCC   | GGACTGTCAACTCTTTCCGC    |
| Tjp-1         | AGAGACAAGATGTCCGCCAG   | TGCAATTCCAAATCCAAACC    |
| Tjp-2         | GTGATTTTCTTCAACCCGGA   | TTTTTGAGCTTGTTGGCTTG    |
| Cxcl2         | CGGTCAAAAAGTTTGCCTTG   | TCCAGGTCAGTTAGCCTTGC    |
| Ccl3          | ACCATGACACTCTGCAACCA   | GTGGAATCTTCCGGCTGTAG    |
| Myd88         | TCATGTTCTCCATACCCTTGGT | AAACTGCGAGTGGGGTCAG     |
| 16S           | GTGSTGCAYGGYTGTCTGCA   | ACGTCRTCCMCACCTTCCTC    |
| Firmicutes    | GGAGYATGTGGTTTAATTCGA  | AGCTGACGACAACCATGCAC    |
| Bacteroidetes | GGCGACCGGCGCACGGG      | GRCCTTCCTCTCAGAACCC     |
