# Supplementary material for: Lactobacillus murinus alleviate intestinal ischemia/reperfusion injury through promoting the release of interleukin-10 from M2 macrophages via Toll-like receptor 2 signaling
Source: PubMed Central journal article supplement (PMC8896269; doi:10.1186/s40168-022-01227-w), 2022-03-03
Supplement: 40168_2022_1227_MOESM7_ESM.pdf [file 40168_2022_1227_MOESM7_ESM.pdf]

Supplementary table2 patient characteristics

| Parameter                           | Low <i>L. murinus</i> patient(n=10) | High <i>L. murinus</i> | <i>P</i> |
|-------------------------------------|-------------------------------------|------------------------|----------|
| male                                | 4(40)                               | 3(30)                  | 0.66     |
| Age, yr                             | 59(56-61)                           | 50(36-61)              | 0.1      |
| Body mass index, kg m <sup>-2</sup> | 23.3(20.8-25.1)                     | 23.7(21.5-24.8)        | 0.66     |
| Duration of anesthesia, min         | 295(283-338)                        | 288(280-370)           | 0.83     |
| Duration of surgery, min            | 235(226-290)                        | 236(223-309)           | 0.77     |
| Duration of CPB, min                | 110(101-134)                        | 118(93-169)            | 0.83     |
| Estimated blood loss, ml            | 300(300-375)                        | 400(300-400)           | 0.2      |

Note. Numbers are counts (percentage) or median (interquartile range).
