# Supplementary material for: Lactobacillus murinus alleviate intestinal ischemia/reperfusion injury through promoting the release of interleukin-10 from M2 macrophages via Toll-like receptor 2 signaling
Source: PubMed Central journal article supplement (PMC8896269; doi:10.1186/s40168-022-01227-w), 2022-03-03

Figure abstract

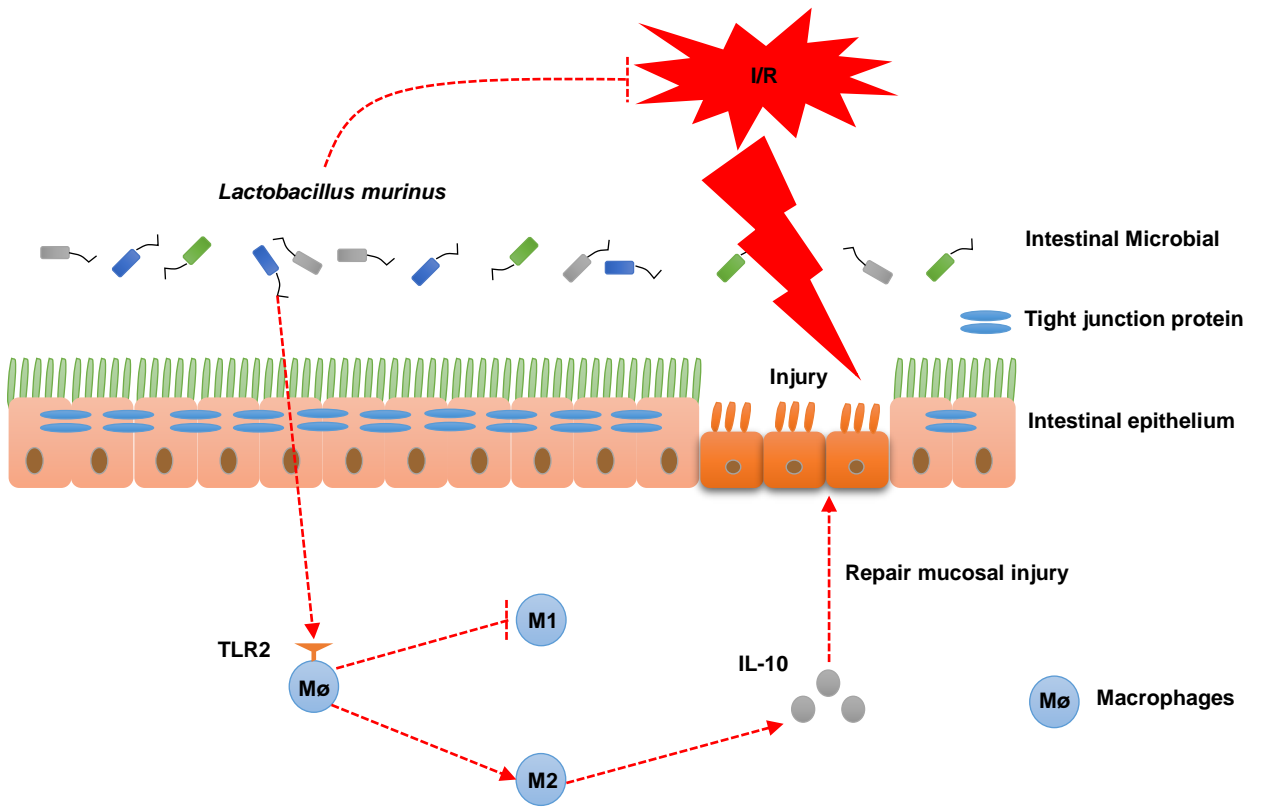

Supplement: 40168_2022_1227_MOESM9_ESM.pdf [file 40168_2022_1227_MOESM9_ESM.pdf]
